# Supplementary material
Source: publisher figshare collection journal article supplement (https://frontiersin.figshare.com/ndownloader/files/23707178)
Supplement: Supplementary file [file 23707178]

## Supplementary Material.

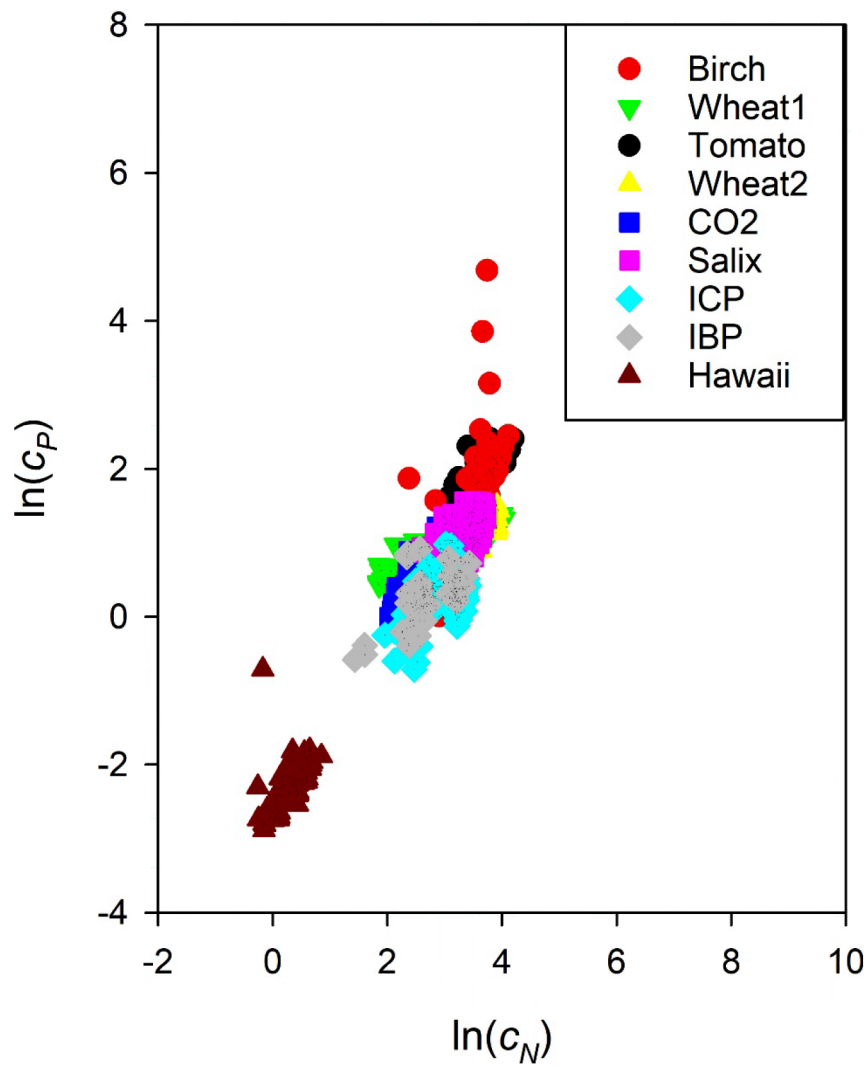

Figure S1. Scatterplot of  $\ln(c_P)$  versus  $\ln(c_N)$  for all data sets except Ideal. The slope of the regression is 1.073 with  $r^2 = 0.814$ , which is significant at the 1% level.
